# Supplementary material for: A fast-responsive two-photon fluorescent probe for in vivo imaging superoxide radical anion with a large stokes shift
Source: Royal Society of Chemistry journal article supplement (doi:10.1039/c7ra11695k), 2018-01-01
Supplement: c7ra11695k1.pdf [file c7ra11695k1.pdf]

*Supporting Information for*

A fast-responsive two-photon fluorescent probe for in vivo imaging superoxide radical anion with a large stokes shift

*Yunpeng Xuan<sup>a</sup>, and Jianbo Qu<sup>\*b</sup>*

*<sup>a</sup> Department of Chest Surgery, the Affiliated Hospital of the Medical College of Qingdao University, Qingdao University, Qingdao, 266071, P. R. China,*

*<sup>b</sup> college of Leather Chemistry and Engineering, Qi Lu University of Technology (Shandong Academy of Sciences), Jinan, 250353, P. R., China, Email: jjhjjh2006letian@163.com*

---

\*Correspondence to: Jianbo Qu, College of Leather Chemistry and Engineering, Qi Lu University of Technology(Shandong Academy of Sciences), Jinan, 250353, P. R., China, Email: jjhjjh2006letian@163.com

## Table of contents

|                |    |
|----------------|----|
| Fig. S1.....   | S3 |
| Fig. S2.....   | S3 |
| Fig. S3.....   | S3 |
| Fig. S4.....   | S4 |
| Fig. S5.....   | S5 |
| Fig. S6.....   | S5 |
| Fig. S7.....   | S6 |
| Table S1 ..... | S6 |

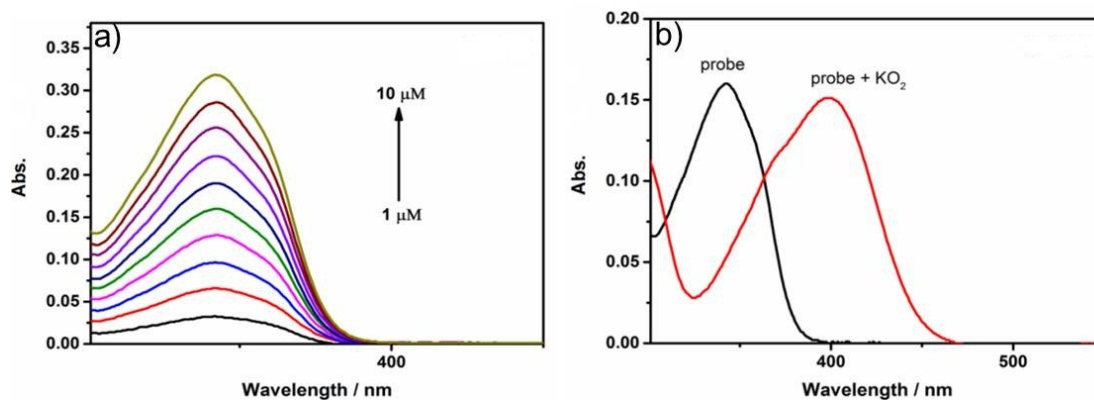

**Fig. S1.** The absorption spectra of **NS-O**: a) The absorption spectra of **NS-O** ( $5 \mu\text{M}$ ) in pH 7.4 PBS/DMSO ( $v/v = 1/1$ ) in the absence  $\text{O}_2^-$ . b) The absorption spectra of **NS-O** ( $5 \mu\text{M}$ ) in pH 7.4 PBS/DMSO ( $v/v = 1/1$ ) in the absence or presence of  $\text{O}_2^-$  (5 equiv)

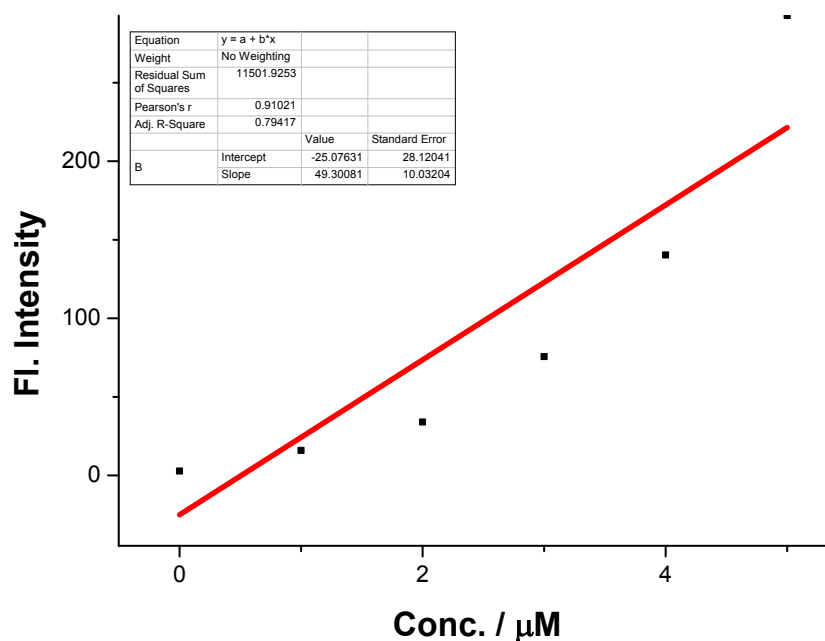

**Fig. S2.** The linear fit of **NS-O** ( $5 \mu\text{M}$ ) in pH 7.4 PBS buffer (50% DMSO) in the absence or presence of  $\text{KO}_2$  (0-1.0 equiv).

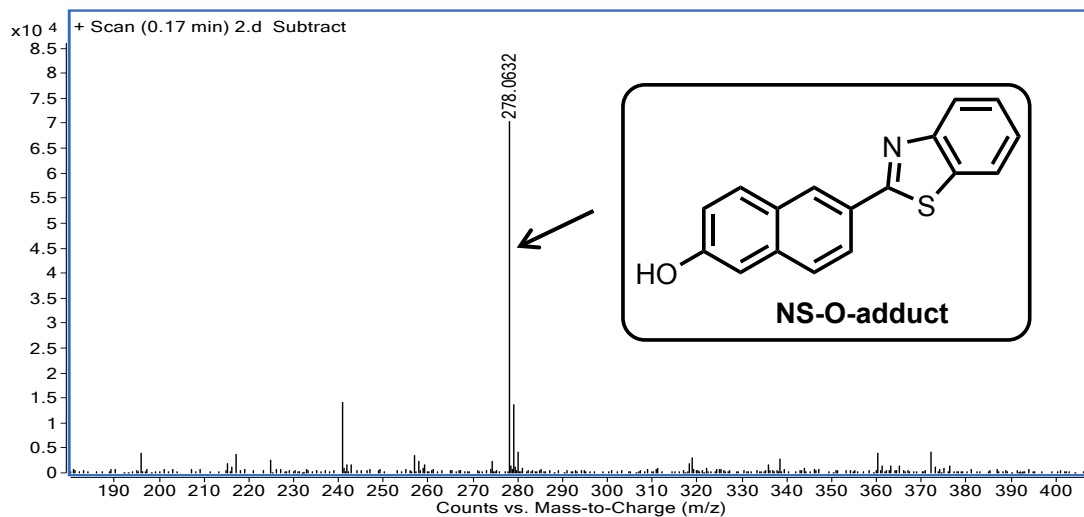

**Fig. S3.** HRMS (positive ion mode) spectrum of NS-O (20  $\mu\text{M}$ ) after treatment with  $\text{KO}_2$  (200  $\mu\text{M}$ ) in pH 7.4 PBS/DMSO (1: 1) for 60 min. The peak at  $m/z$  278.0632 corresponds to NS-O-adduct.

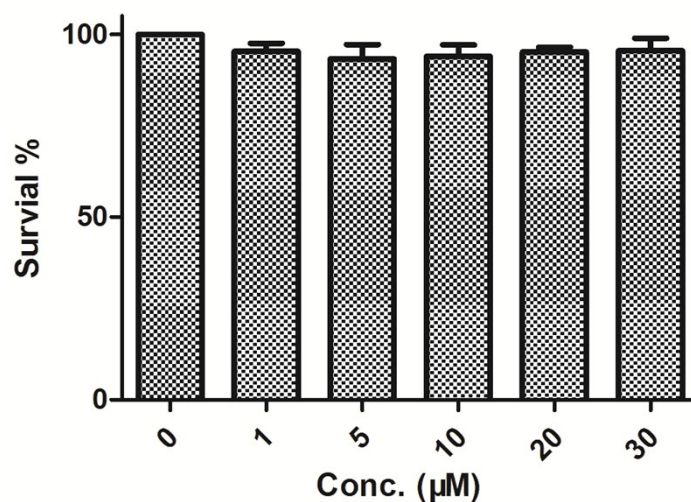

**Fig. S4.** Cytotoxicity assays of NS-O at different concentrations (0  $\mu\text{M}$ ; 1  $\mu\text{M}$ ; 5  $\mu\text{M}$ ; 10  $\mu\text{M}$ ; 20  $\mu\text{M}$ ; 30  $\mu\text{M}$ ) for HeLa cells

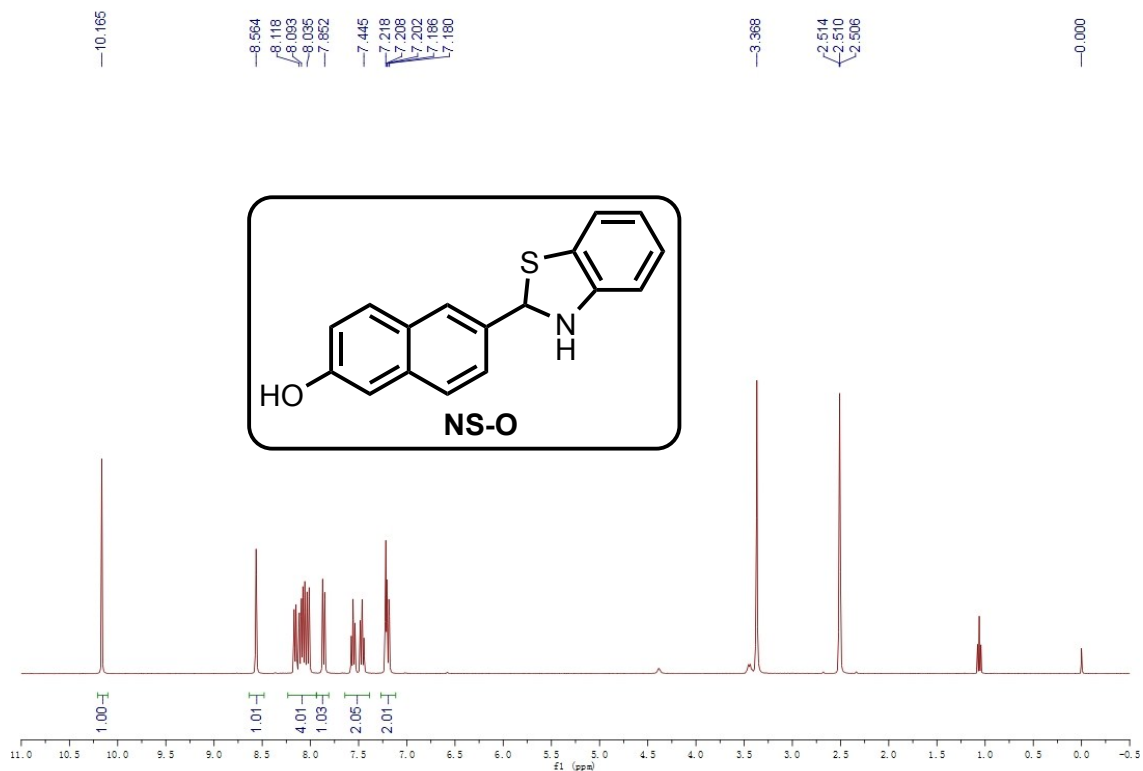

**Fig. S5.**  $^1\text{H NMR}$  (DMSO- $d_6$ ) spectrum of NS-O.

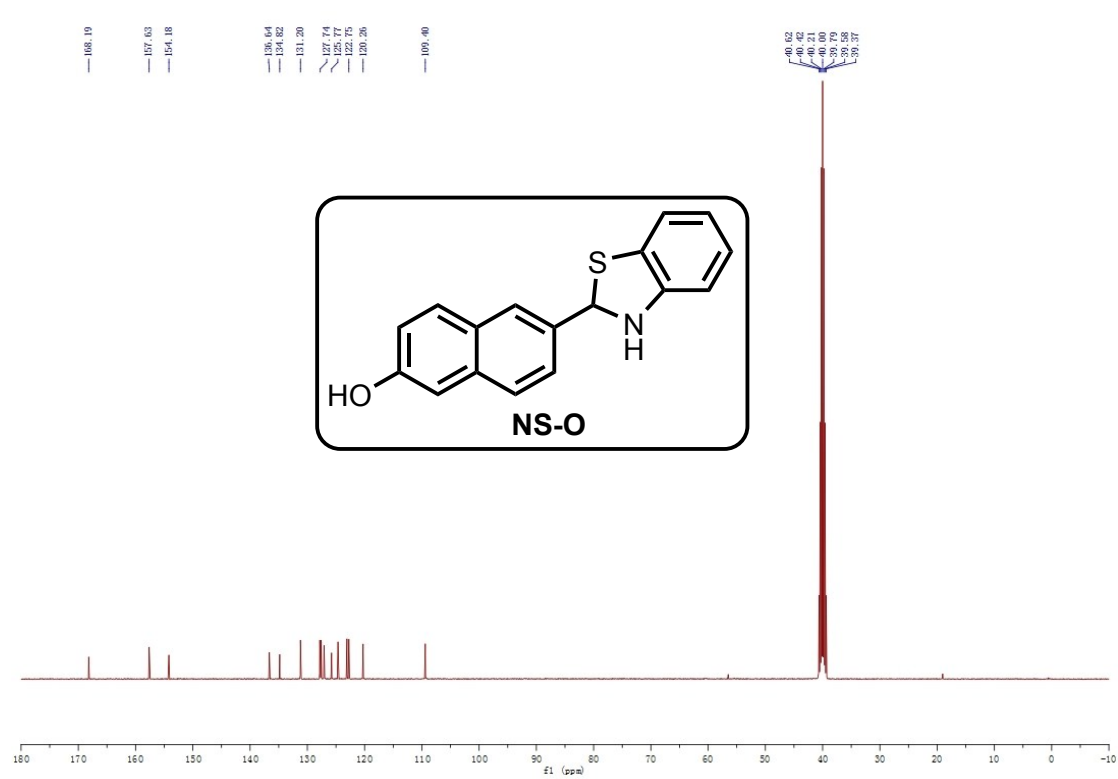

**Fig. S6.**  $^{13}\text{C-NMR}$  (DMSO- $d_6$ ) spectrum of NS-O.

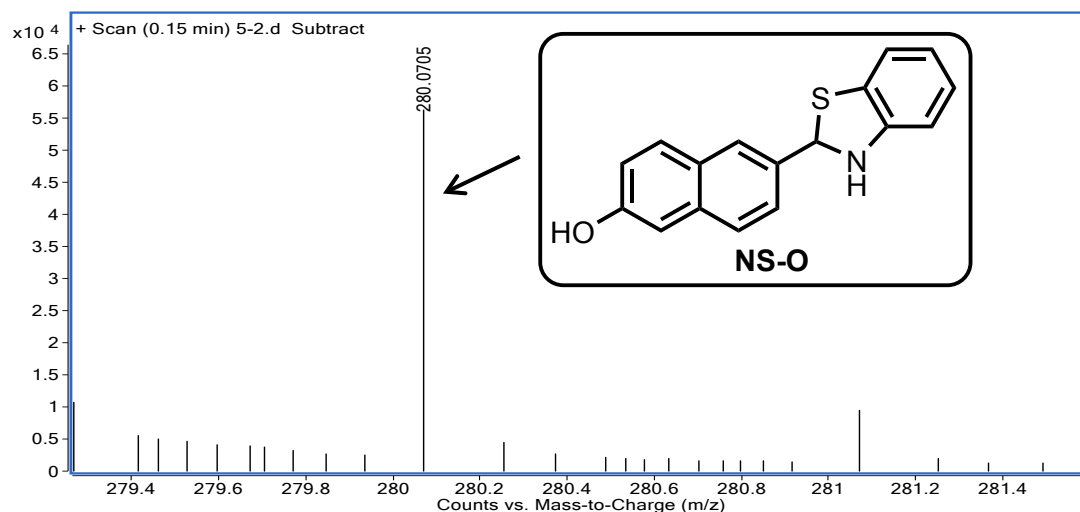

**Fig. S7.** HRMS spectrum of the probe NS-O.

| Probes         | Rf. | Response time | Selectivity and application                                                                       | Detection limit                  |
|----------------|-----|---------------|---------------------------------------------------------------------------------------------------|----------------------------------|
| <p>TPE-CLA</p> | 8a  | -             | Determination of O <sub>2</sub> <sup>-</sup> in PBS Buffer, Living Cells and mice.                | 0.21nM for FL and 0.38 nM for CL |
| <p>HQ</p>      | 8b  | About 3 min   | Determination of O <sub>2</sub> <sup>-</sup> in PBS Buffer, Living Cells, tissues and Zebrafish.  | -                                |
| <p>CyR</p>     | 8c  | 10 min        | Determination of O <sub>2</sub> <sup>-</sup> in HEPES Buffer, Living Cells, Mouse, and Zebrafish. | 9.9 nM                           |

|                                                                                                                                    |                  |        |                                                                                                  |         |
|------------------------------------------------------------------------------------------------------------------------------------|------------------|--------|--------------------------------------------------------------------------------------------------|---------|
| 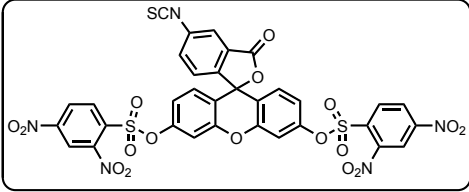                                                  | 8d               | 10 min | Determination of O <sub>2</sub> <sup>-</sup> in PBS Buffer and Living Cells                      | -       |
|  <p style="text-align: center;"><b>PNF-1</b></p>  | 8e               | 10 min | Determination of O <sub>2</sub> <sup>-</sup> in HEPS Buffer and Living Cells                     | 9.9 nM  |
|                                                   | 8f               | 10 min | Not mentioned                                                                                    | 1.0 pM  |
|  <p style="text-align: center;"><b>DBZTC</b></p> | 8g               | 10 min | Determination of O <sub>2</sub> <sup>-</sup> in HEPS Buffer and Living Cells                     | 1.68 nM |
|  <p style="text-align: center;"><b>NS-O</b></p> | <b>this work</b> | 2 min  | Determination of O <sub>2</sub> <sup>-</sup> in PBS Buffer, Living Cells, tissues and Zebrafish. | 1.71 μM |

**Table S1.** Properties of the probe **NS-O** and the reported fluorescent probes.
